# Supplementary material
Source: HighWire-hosted journal article supplement (https://ejhp.bmj.com/highwire/filestream/140059/field_highwire_adjunct_files/0/ejhpharm-2015-000664supp.pdf)

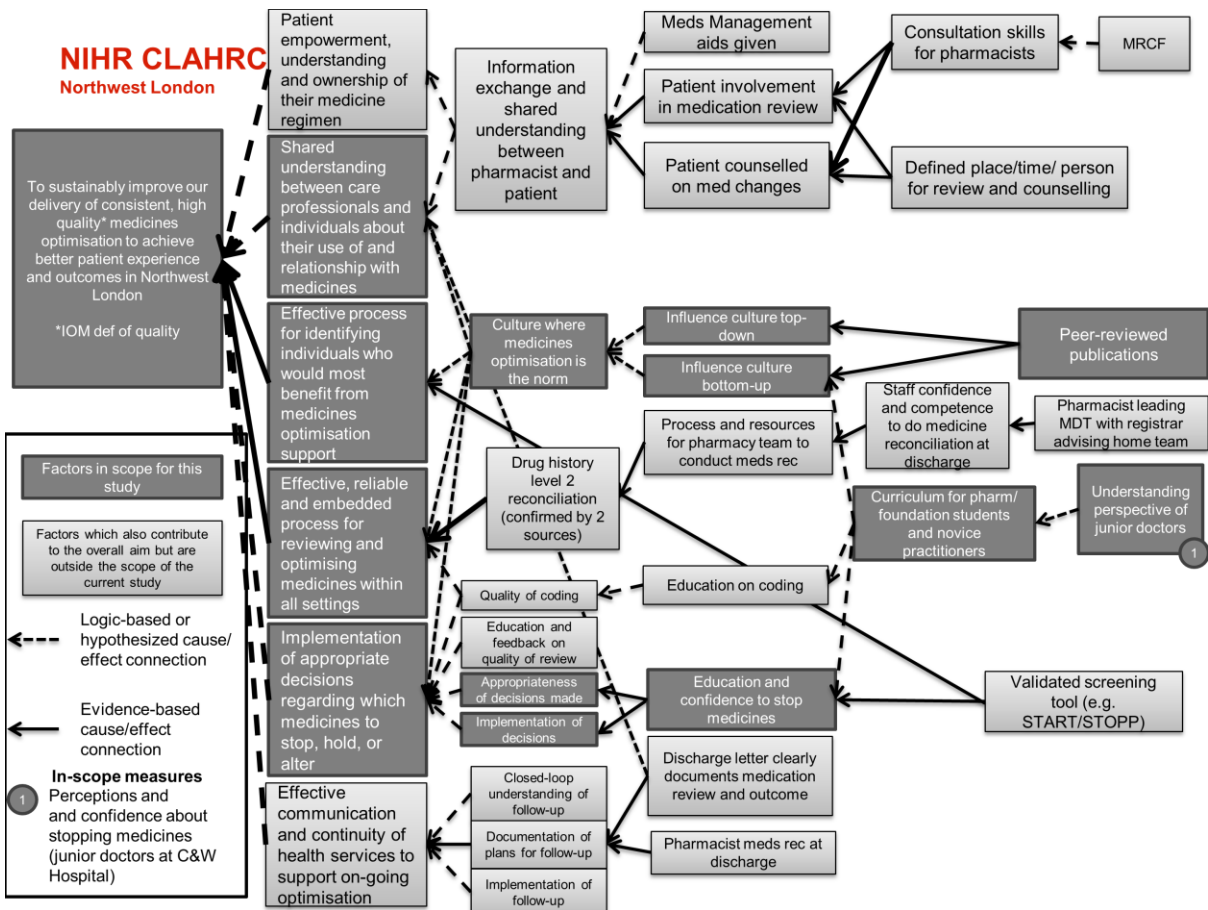

Supplement: ejhpharm-2015-000664supp.pdf [file ejhpharm-2015-000664supp.pdf]
